# Supplementary material for: Crystalline thiacalixarene assembly for adsorption ability toward linear and branched C6 alkane vapor isomers
Source: Royal Society of Chemistry journal article supplement (doi:10.1039/d4ce00696h), 2024-01-01
Supplement: d4ce00696h1.pdf [file d4ce00696h1.pdf]

Supporting Information

**Crystalline thiacalixarene assembly for adsorption ability  
toward linear and branched C6 alkane vapor isomers**

Manabu Yamada,<sup>\*a</sup> Ruka Yoshizaki,<sup>a</sup> Faiq Sayfiyy Bin Shahril Anuar,<sup>b</sup> Hiroshi  
Katagiri,<sup>c</sup> Kazuhiko Akimoto<sup>d</sup> and Fumio Hamada<sup>e</sup>

<sup>a</sup> Applied Chemistry Course, Graduate School of Engineering Science, Akita University,  
1-1 Tegatagakuen-machi, Akita 010-8502, Japan.

<sup>b</sup> Applied Chemistry Course, Department of Engineering Science, Akita University, 1-1  
Tegatagakuen-machi, Akita 010-8502, Japan.

<sup>c</sup> Graduate School of Organic Materials Science, Yamagata University, 4-3-16, Jonan,  
Yonezawa, Yamagata 992-8510 Japan.

<sup>d</sup> Nissan Chemical Industries, Ltd., 6903-1 Oaza-Onoda, Sanyo-Onoda, Yamaguchi 756-  
0093, Japan

<sup>d</sup> Emeritus Professor, Akita University, 1-1 Tegatagakuen-machi, Akita 010-8502, Japan

<sup>\*</sup>Corresponding author. Tel +81 18 889 3068; fax: +81 18 889 3068.

E-mail address: myamada@gipc.akita-u.ac.jp

# Table of Contents

## 1. Experimental Section

Materials

Methods

Solution  $^1\text{H}$  NMR

Powder X-ray diffraction

Vapor sorption experiments of the activated crystal **1a** toward five C6 alkanes

Thermogravimetric analysis (TGA)

## 2. Supporting figures

**Fig. S1** Sorption experiments of single or two-component alkane vapors by the activated crystal **1a** for five C6 alkanes, such as *n*-hexane (*n*-C6), isohexane (2-C6), 3-methylpentane (3-C6), and 2,2- and 2,3-dimethylbutanes (2,2-C6 and 2,3-C6) in vials.

**Fig. S2** 500 MHz  $^1\text{H}$  NMR spectra ( $\delta$  from TMS,  $\text{CDCl}_3$ ) after exposure of **1a** with C6 alkane vapors as each single component system. a) **1a** exposed to 2-C6, b) **1a** exposed to 3-C6, c) **1a** exposed to 2,2-C6, and d) **1a** exposed to 2,3-C6.

**Fig. S3** 500 MHz  $^1\text{H}$  NMR spectra ( $\delta$  from TMS,  $\text{CDCl}_3$ ) after exposure of **1a** with *n*-C6 alkane vapors as the single-component system.

**Fig. S4** 500 MHz  $^1\text{H}$  NMR spectrum ( $\delta$  from TMS,  $\text{CDCl}_3$ ) after exposure of **1a** with 2-C6 alkane vapors as a function of exposure time.

**Fig. S5** 500 MHz  $^1\text{H}$  NMR spectrum ( $\delta$  from TMS,  $\text{CDCl}_3$ ) after exposure of **1a** with 3-C6 alkane vapors as a function of exposure time.

**Fig. S6** 500 MHz  $^1\text{H}$  NMR spectrum ( $\delta$  from TMS,  $\text{CDCl}_3$ ) after exposure of **1a** with 2,2-C6 alkane vapors as a function of exposure time.

**Fig. S7** 500 MHz  $^1\text{H}$  NMR spectrum ( $\delta$  from TMS,  $\text{CDCl}_3$ ) after exposure of **1a** with 2,3-C6 alkane vapors as a function of exposure time.

**Fig. S8** Reusability and adsorbed quantities of **1a** for adsorption of a) 2-, b) 3-, c) 2,2-, and d) 2,3-C6 vapors in 5th cycles.

**Fig. S9** 500 MHz <sup>1</sup>H NMR spectra ( $\delta$  from TMS, CDCl<sub>3</sub>) after exposure of **1a** with *n*-C6 and branched alkane mixed vapors as each two-component system. a) **1a** exposed to *n*-C6/2-C6, b) **1a** exposed to *n*-C6/3-C6, c) **1a** exposed to *n*-C6/2,2-C6, d) **1a** exposed to *n*-C6/2,3-C6.

**Fig. S10** 500 MHz <sup>1</sup>H NMR spectra ( $\delta$  from TMS, CDCl<sub>3</sub>) after exposure of **1a** with 2-C6 and branched alkane mixed vapors as each two-component system. a) **1a** exposed to 2-C6/3-C6, b) **1a** exposed to 2-C6/2,2-C6, and c) **1a** exposed to 2-C6/2,3-C6.

**Fig. S11** 500 MHz <sup>1</sup>H NMR spectra ( $\delta$  from TMS, CDCl<sub>3</sub>) after exposure of **1a** with branched alkane mixed vapors as each two-component system. a) **1a** exposed to 3-C6/2,2-C6, b) **1a** exposed to 3-C6/2,3-C6, and c) **1a** exposed to 2,2-C6/2,3-C6.

**Fig. S12** PXRD patterns of **1a** exposed to *n*-C6/2-C6 (red line), *n*-C6/3-C6 (blue line), *n*-C6/2,2-C6 (purple line), *n*-C6/2,3-MeCyC6 (green line) vapors as a two-component system, and as-synthesized **1**·CyC6 (black line).

**Fig. S13** PXRD patterns of **1a** exposed to 2-C6/3-C6 (blue line), 2-C6/2,2-C6 (blue line), 2-C6/2,3-C6 (blue line), 3-C6/2,2-C6 (blue line), 2-C6/2,3-C6 (blue line), 2,2-C6/2,3-C6 (pink line) vapors as a two-component system, and as-synthesized **1**·CyC6 (black line).

**Fig. S14** Thermogravimetric analysis (TGA) of *n*-C6/2-C6 (yellow line), *n*-C6/3-C6 (green line), *n*-C6/2,2-C6 (red line), and *n*-C6/2,3-C6 (blue line) adsorbed in **1a**.

**Fig. S15** Thermogravimetric analysis (TGA) of 2-C6/3-C6 (yellow line), 2-C6/2,2-C6 (green line), 2-C6/2,3-C6 (green line), 3-C6/2,2-C6 (yellow line), 3-C6/2,3-C6 (yellow line), and 2,2-C6/2,3-C6 (blue line) adsorbed in **1a**.

**Fig. S16** Molecular size of the three types of C6 alkanes calculating by  $\omega$ B97X-D functional with 6-31G\* basis set using Spartan '16 software (version 2.0.7)

### **3. References**

## 1. Experimental Section

### Materials

All solvents were purchased from commercial sources and used as received. The reactions were carried out in a nitrogen atmosphere. *p*-Bromothiocalix[4]arene propyl ether molecules as a 1,3-alternate conformer were also synthesized according to the literature.<sup>S1,</sup>

S2

### Methods

#### Solution <sup>1</sup>H NMR

Solution <sup>1</sup>H NMR spectra were recorded at 500 MHz JEOL ECA500 instrument. Chemical shifts are quoted as parts per million (ppm) relative to tetramethylsilane (CDCl<sub>3</sub>).

#### Powder X-ray diffraction

Powder X-ray diffractions (PXRD) were collected with a Rigaku Ultima IV diffractometer by using Cu K $\alpha$  radiation ( $\lambda = 1.5406 \text{ \AA}$ , 40 kV, 40 mA) with a graphite monochromator at a step width of  $0.02^\circ 2\theta$  and a scan speed  $2.000^\circ \text{ min}^{-1}$ .

#### Vapor sorption experiments of the activated crystal **1a** toward five C6 alkanes

**Pre-treatment:** Before vapor adsorption experiments, the activated crystal **1a** was pretreated at 100°C under reduced pressure overnight for **1** just before using the vapor adsorption experiments. The activated crystal **1a** was confirmed by a <sup>1</sup>H NMR study to not remain cyclohexane (CyC6) in **1a**.

**Vapor adsorption experiments:** Adsorption experiments of **1a** for the five C6 alkane

vapors were conducted using two vials as shown in Figure S1. The activated crystal **1a** (0.2 g) placed in a small vial (5 mL) was inserted into a larger vial (30 mL), which was loaded with each C6 alkane (5 mL) or two-component alkane (the ratio = 1:1 (= 2.5 mL + 2.5 mL)), at ambient temperature and varying exposure times

### **Thermogravimetric analysis (TGA)**

Thermogravimetric analysis (TGA) was recorded on a HITACHI STA7300 apparatus in the temperature range between 25 and 500 °C under a N<sub>2</sub> atmosphere at a heating rate of 10 °C min<sup>-1</sup>.

## Sorption Experiment in Vials

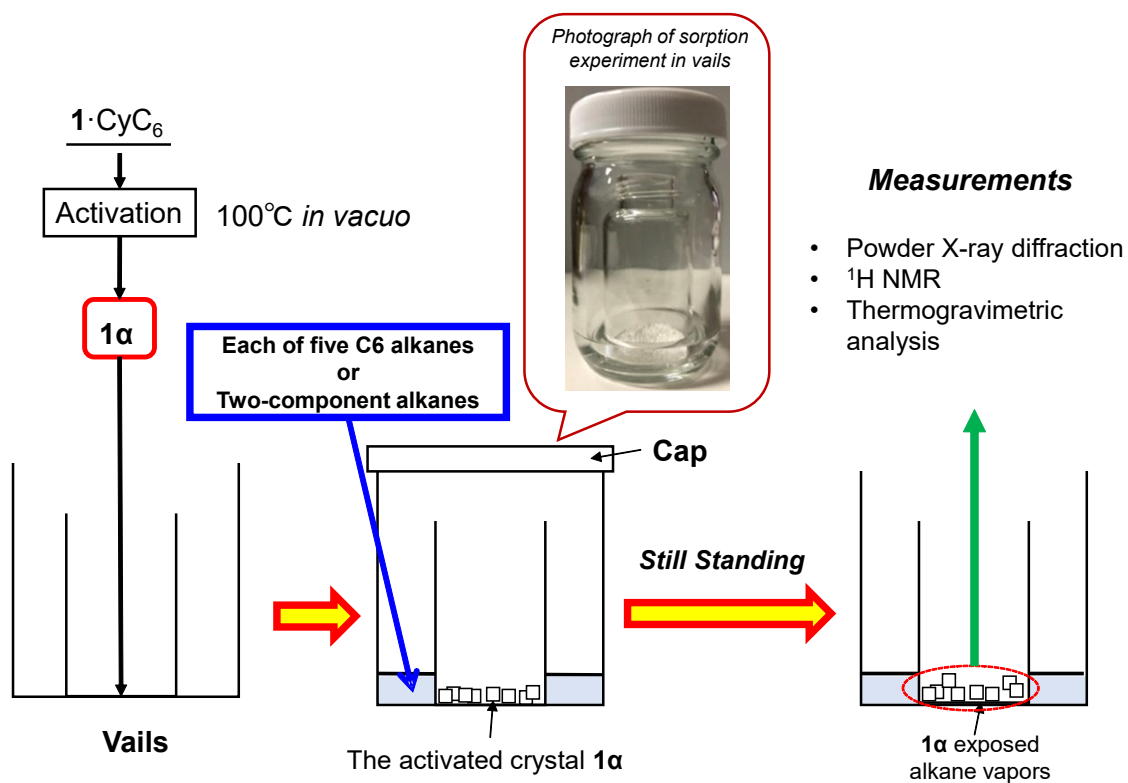

**Figure S1** Sorption experiments of single or two-component alkane vapors by the activated crystal  $1\alpha$  for five C6 alkanes, such as *n*-hexane (*n*-C6), isohexane (2-C6), 3-methylpentane (3-C6), and 2,2- and 2,3-dimethylbutanes (2,2-C6 and 2,3-C6) in vials.

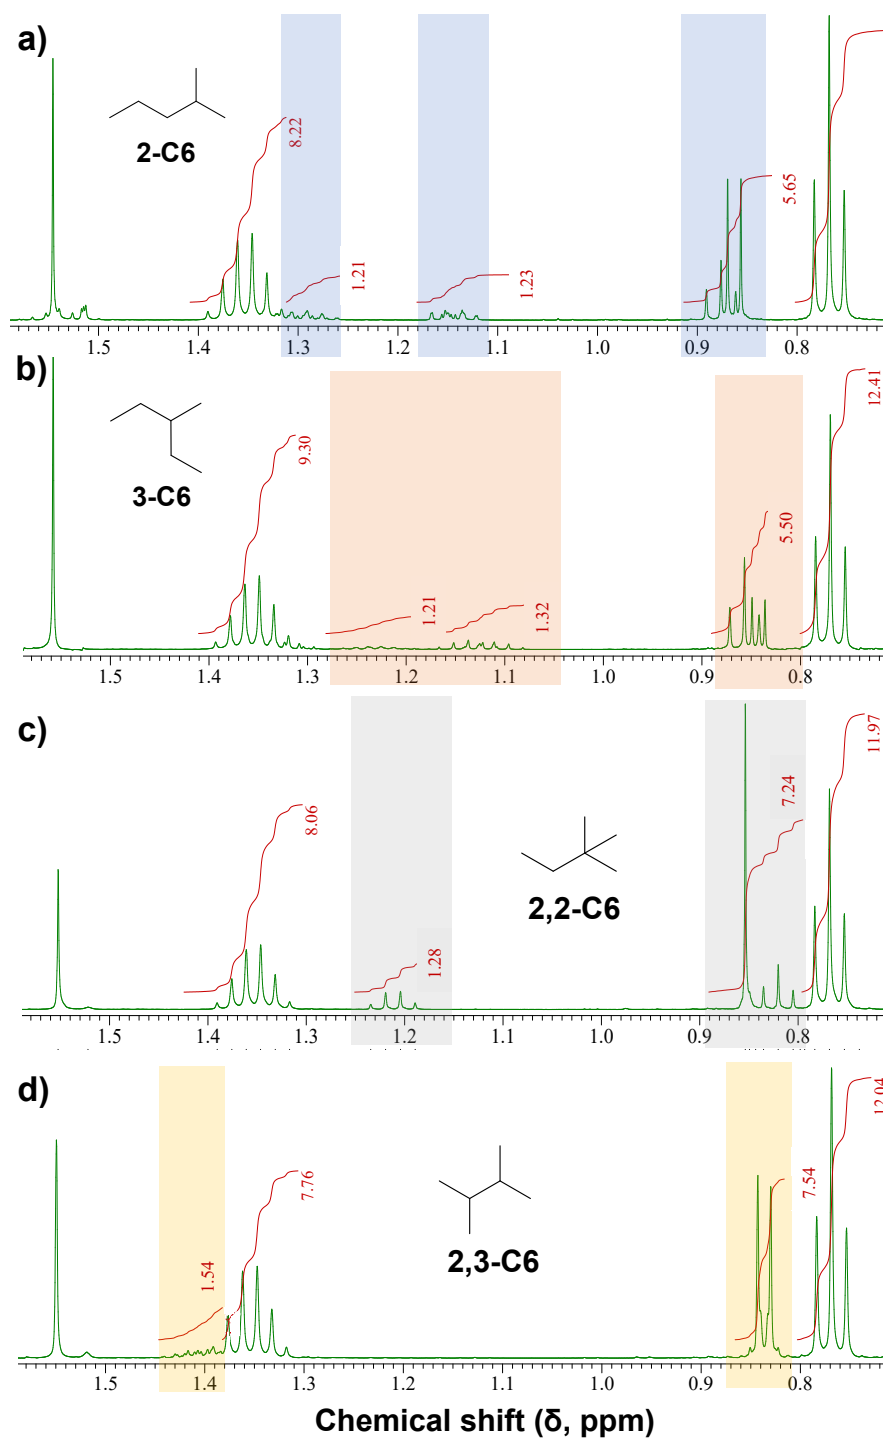

**Fig. S2** 500 MHz  $^1\text{H}$  NMR spectra ( $\delta$  from TMS,  $\text{CDCl}_3$ ) after exposure of **1a** with C6 alkane vapors as each single component system. a) **1a** exposed to 2-C6, b) **1a** exposed to 3-C6, c) **1a** exposed to 2,2-C6, and d) **1a** exposed to 2,3-C6. The colored areas on the spectra indicate the regions where the respective chemical shifts of the C6 alkanes appear. The color codes: pale purple = *n*-C6; pale blue = 2-C6; pale orange = 3-C6; pale gray = 2,2-C6; pale yellow = 2,3-C6.



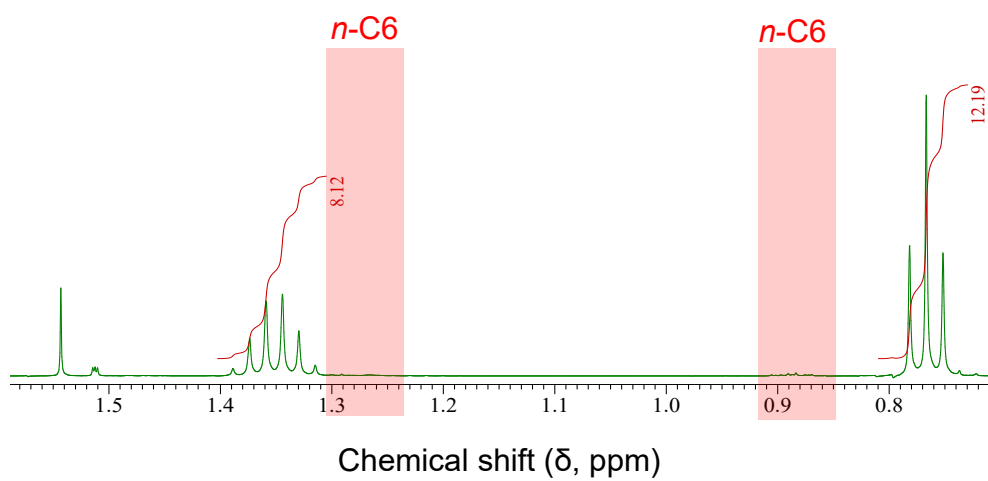

**Fig. S3** 500 MHz <sup>1</sup>H NMR spectra (δ from TMS, CDCl<sub>3</sub>) after exposure of **1a** with *n*-C<sub>6</sub> alkane vapors as the single-component system. The color code: pink = *n*-C<sub>6</sub>.

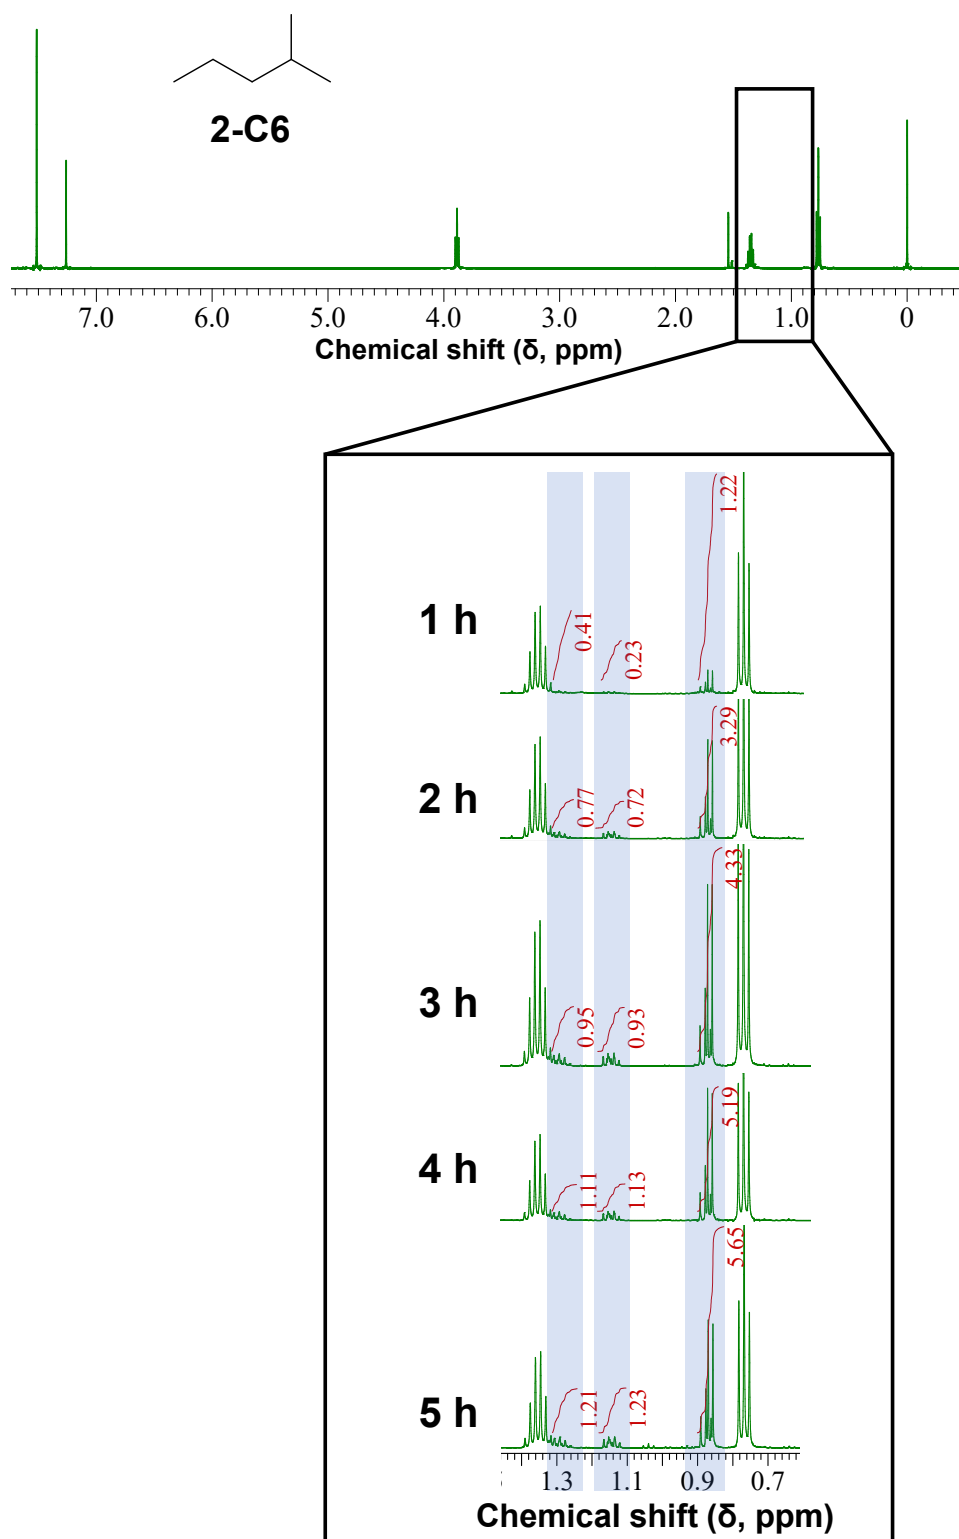

**Fig. S4** 500 MHz <sup>1</sup>H NMR spectrum (δ from TMS, CDCl<sub>3</sub>) after exposure of **1a** with 2-C6 alkane vapors as a function of exposure time.

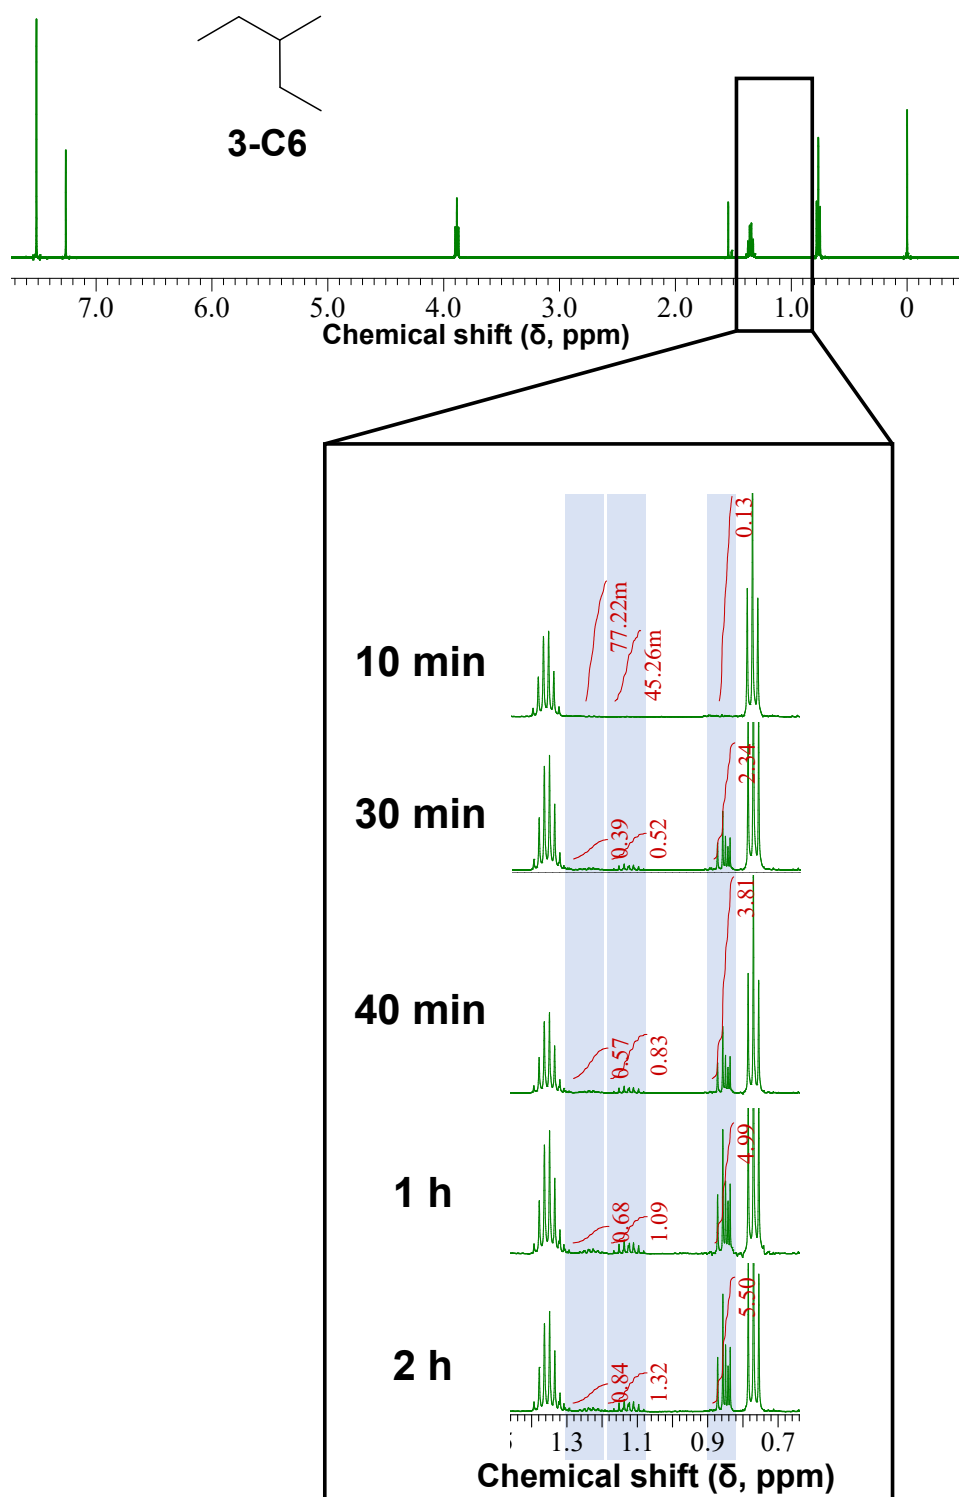

**Fig. S5** 500 MHz <sup>1</sup>H NMR spectrum (δ from TMS, CDCl<sub>3</sub>) after exposure of **1a** with 3-C6 alkane vapors as a function of exposure time.

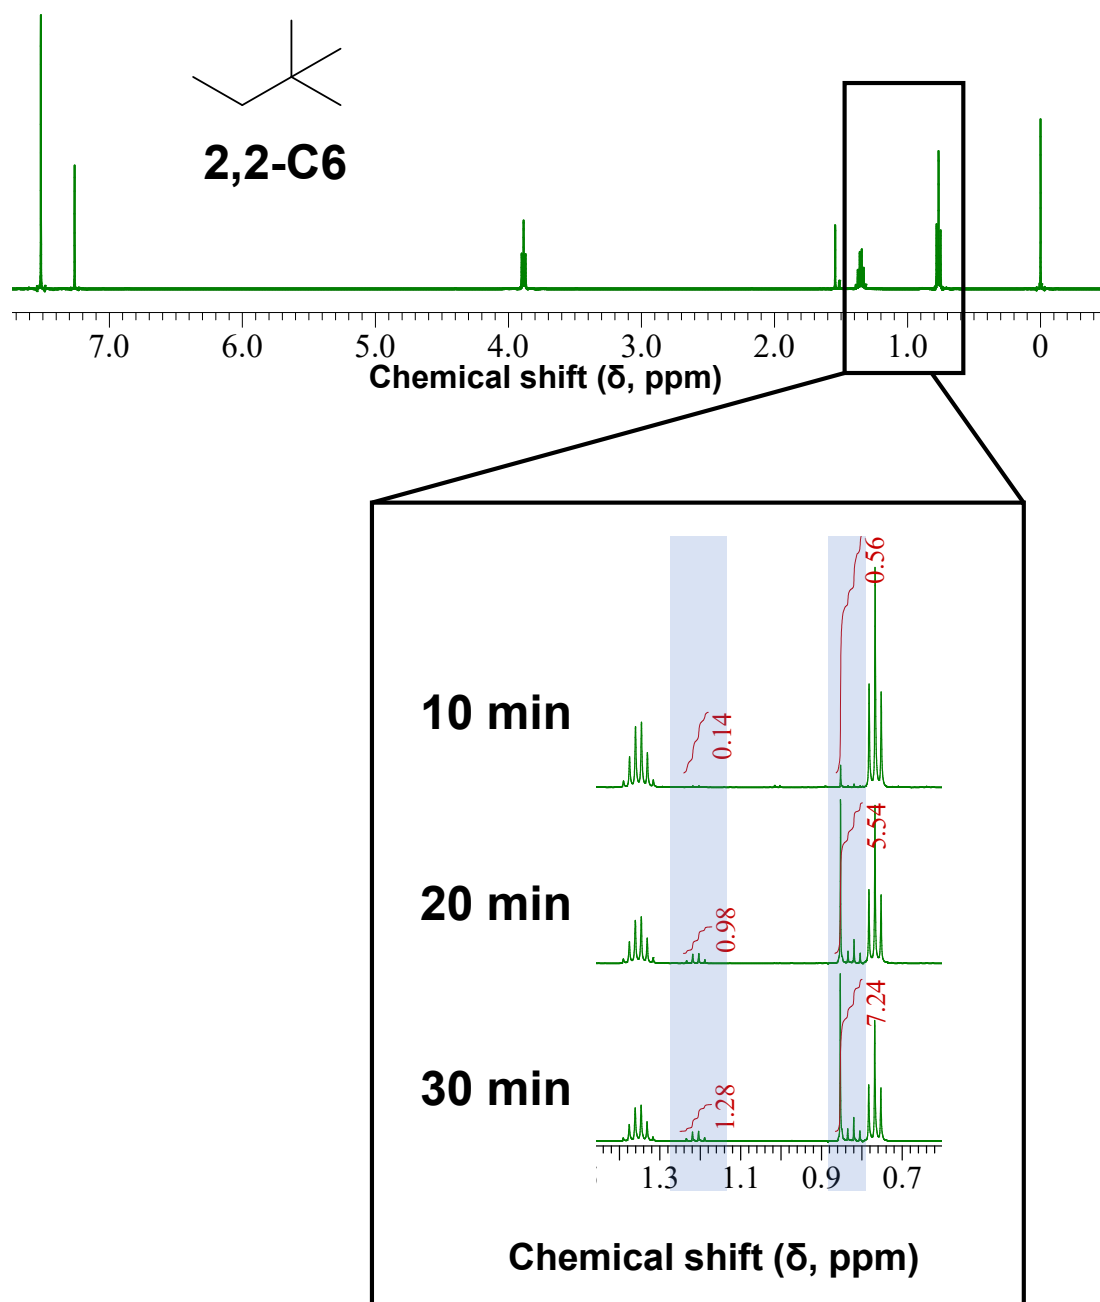

**Fig. S6** 500 MHz <sup>1</sup>H NMR spectrum (δ from TMS, CDCl<sub>3</sub>) after exposure of **1a** with 2,2-C<sub>6</sub> alkane vapors as a function of exposure time.

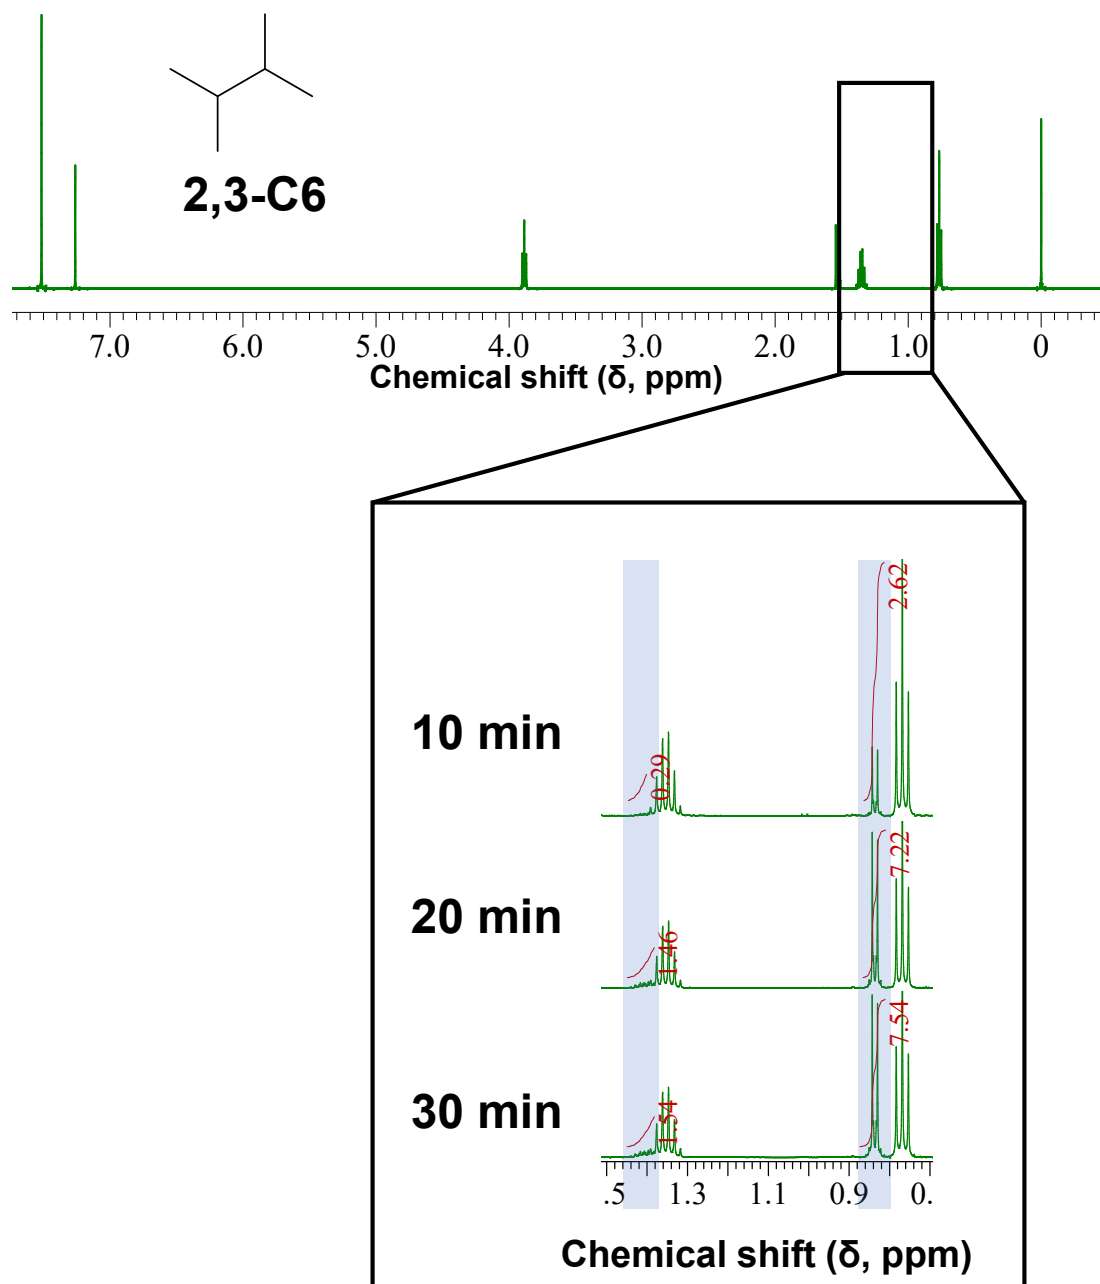

**Fig. S7** 500 MHz <sup>1</sup>H NMR spectrum ( $\delta$  from TMS,  $\text{CDCl}_3$ ) after exposure of **1a** with 2,3-C6 alkane vapors as a function of exposure time.

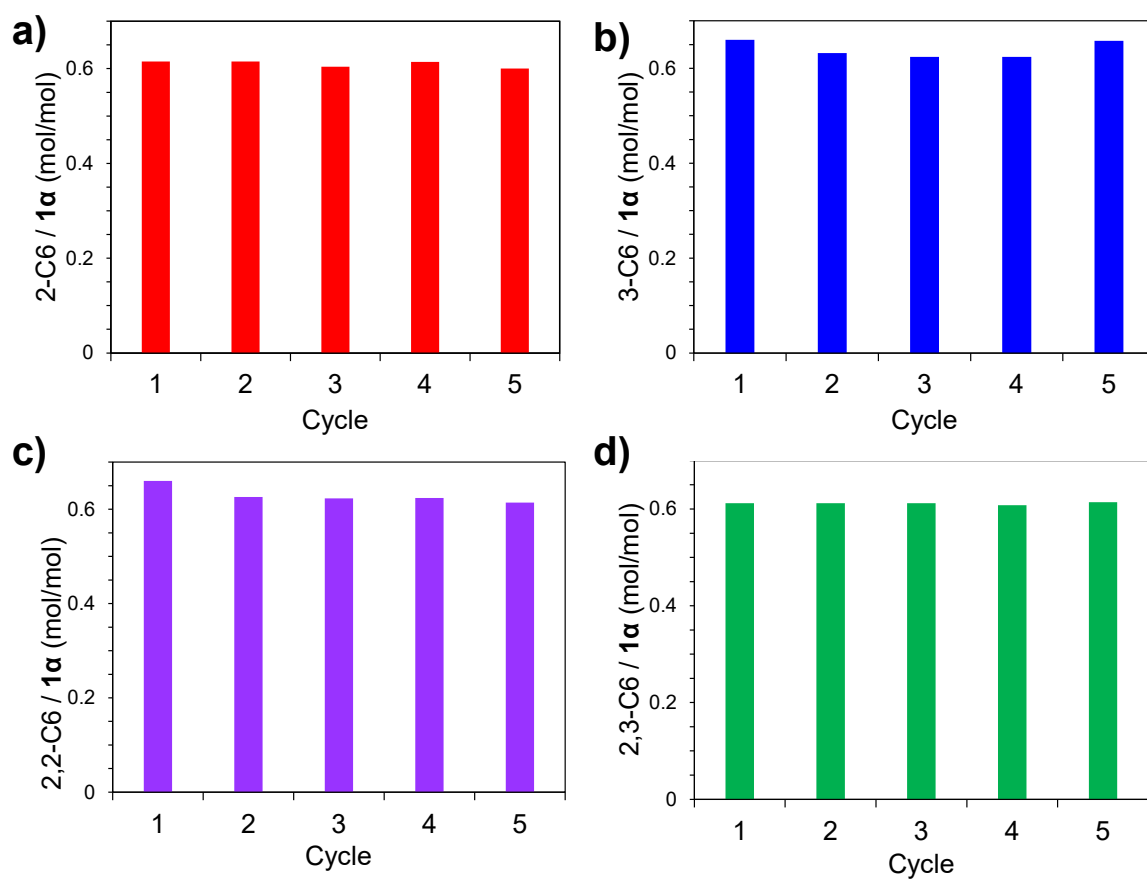

**Fig. S8** Reusability and adsorbed quantities of  $1\alpha$  for adsorption of a) 2-, b) 3-, c) 2,2-, and d) 2,3-C6 vapors in 5th cycles.

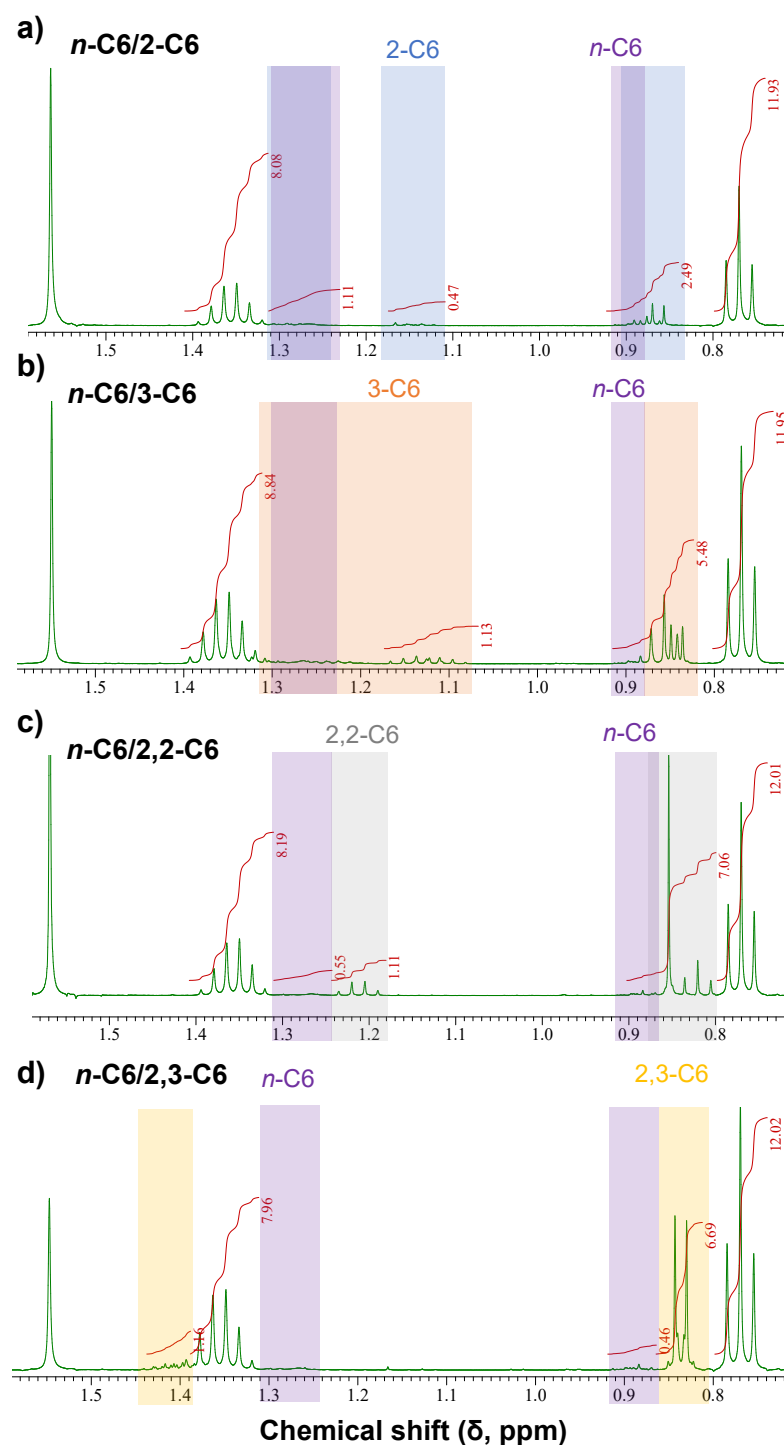

**Fig. S9** 500 MHz  $^1\text{H}$  NMR spectra ( $\delta$  from TMS,  $\text{CDCl}_3$ ) after exposure of **1a** with  $n\text{-C6}$  and branched alkane mixed vapors as each two-component system. a) **1a** exposed to  $n\text{-C6}/2\text{-C6}$ , b) **1a** exposed to  $n\text{-C6}/3\text{-C6}$ , c) **1a** exposed to  $n\text{-C6}/2,2\text{-C6}$ , d) **1a** exposed to  $n\text{-C6}/2,3\text{-C6}$ . The colored areas on the spectra indicate the regions where the respective chemical shifts of the C6 alkanes appear. The color codes: pale purple =  $n\text{-C6}$ ; pale blue =  $2\text{-C6}$ ; pale orange =  $3\text{-C6}$ ; pale gray =  $2,2\text{-C6}$ ; pale yellow =  $2,3\text{-C6}$ .

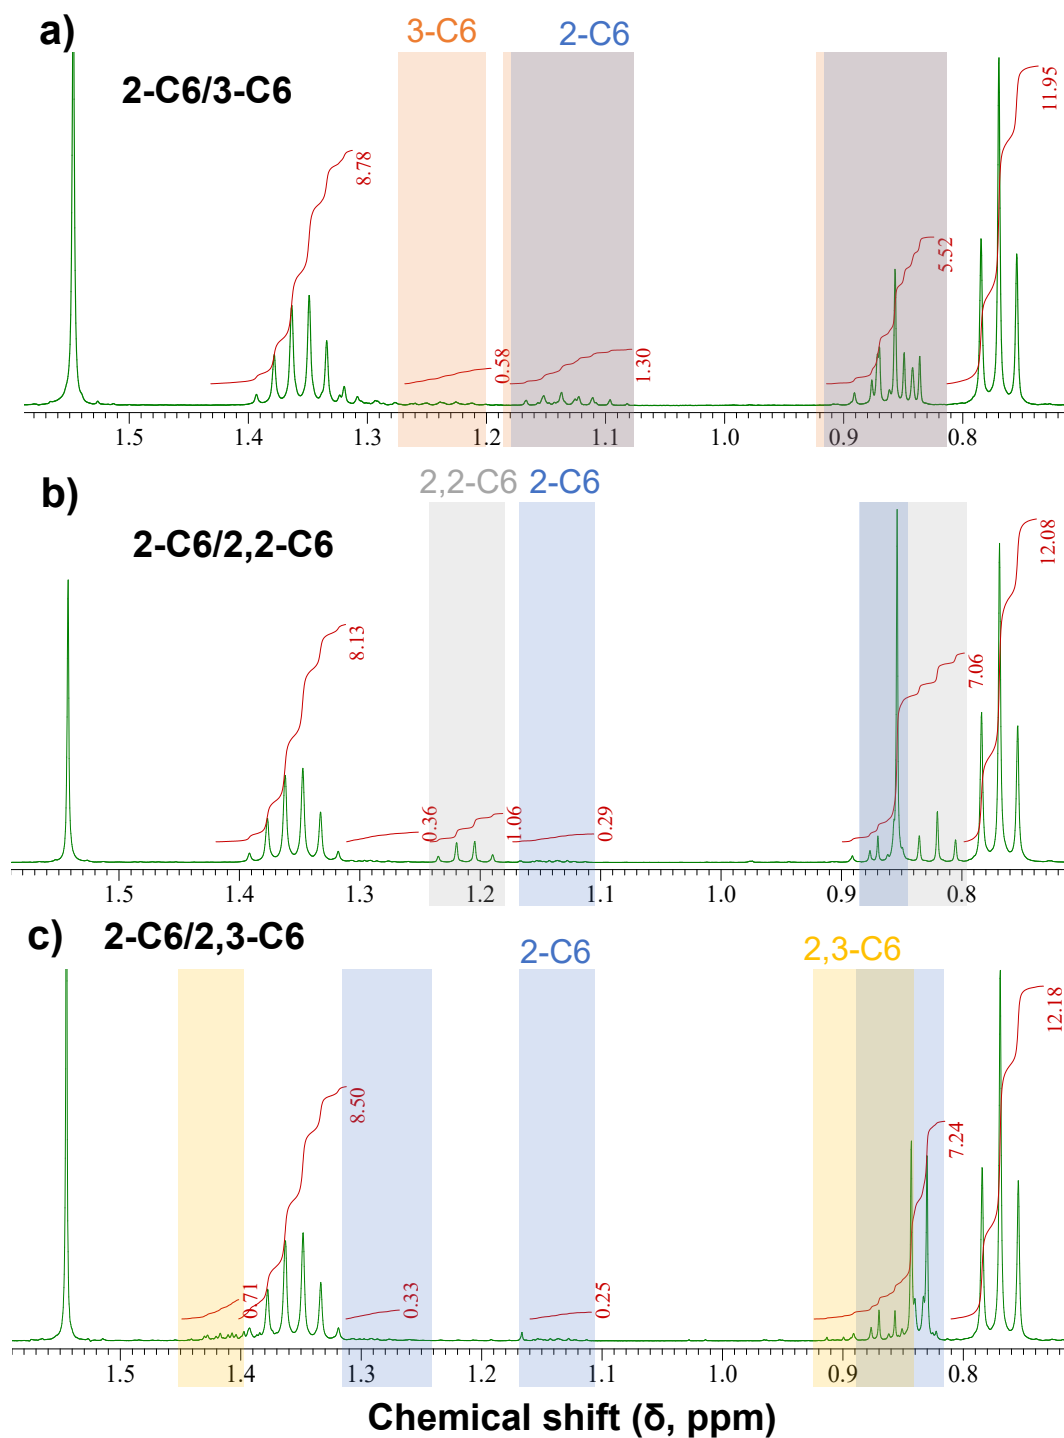

**Fig. S10** 500 MHz  $^1\text{H}$  NMR spectra ( $\delta$  from TMS,  $\text{CDCl}_3$ ) after exposure of **1a** with 2-C6 and branched alkane mixed vapors as each two-component system. a) **1a** exposed to 2-C6/3-C6, b) **1a** exposed to 2-C6/2,2-C6, and c) **1a** exposed to 2-C6/2,3-C6. The colored areas on the spectra indicate the regions where the respective chemical shifts of the C6 alkanes appear. The color codes: pale blue = 2-C6; pale orange = 3-C6; pale gray = 2,2-C6; pale yellow = 2,3-C6.



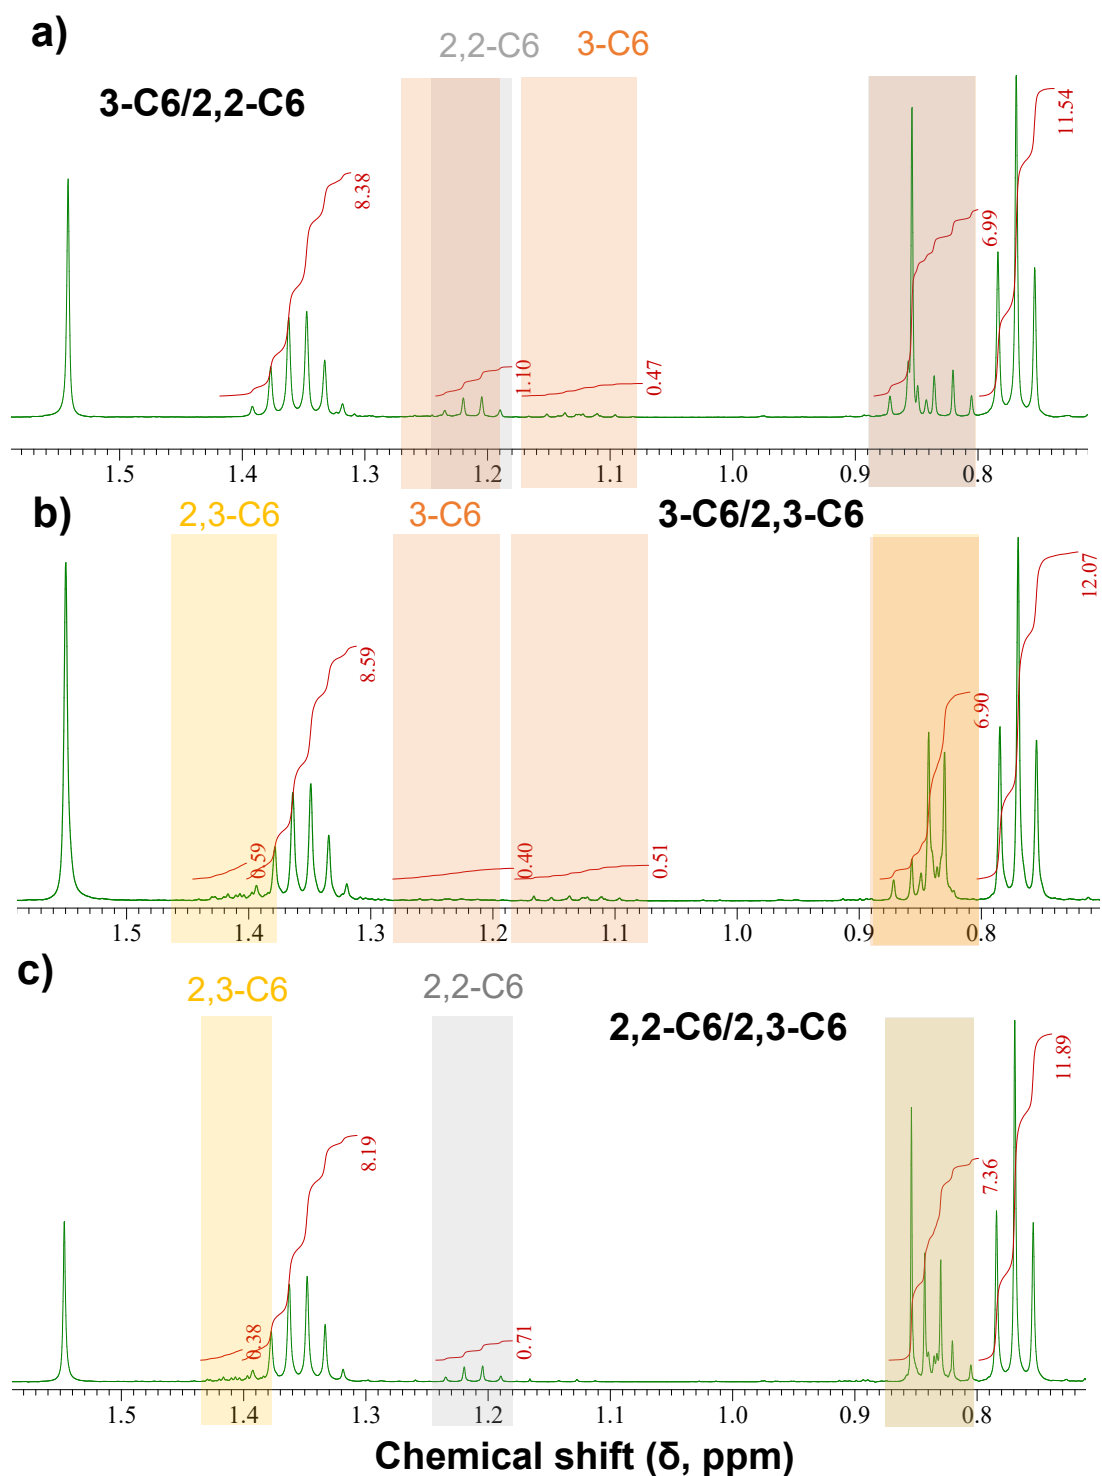

**Fig. S11** 500 MHz  $^1\text{H}$  NMR spectra ( $\delta$  from TMS,  $\text{CDCl}_3$ ) after exposure of **1a** with branched alkane mixed vapors as each two-component system. a) **1a** exposed to 3-C6/2,2-C6, b) **1a** exposed to 3-C6/2,3-C6, and c) **1a** exposed to 2,2-C6/2,3-C6. The colored areas on the spectra indicate the regions where the respective chemical shifts of the C6 alkanes appear. The color codes: pale orange = 3-C6; pale gray = 2,2-C6; pale yellow = 2,3-C6.

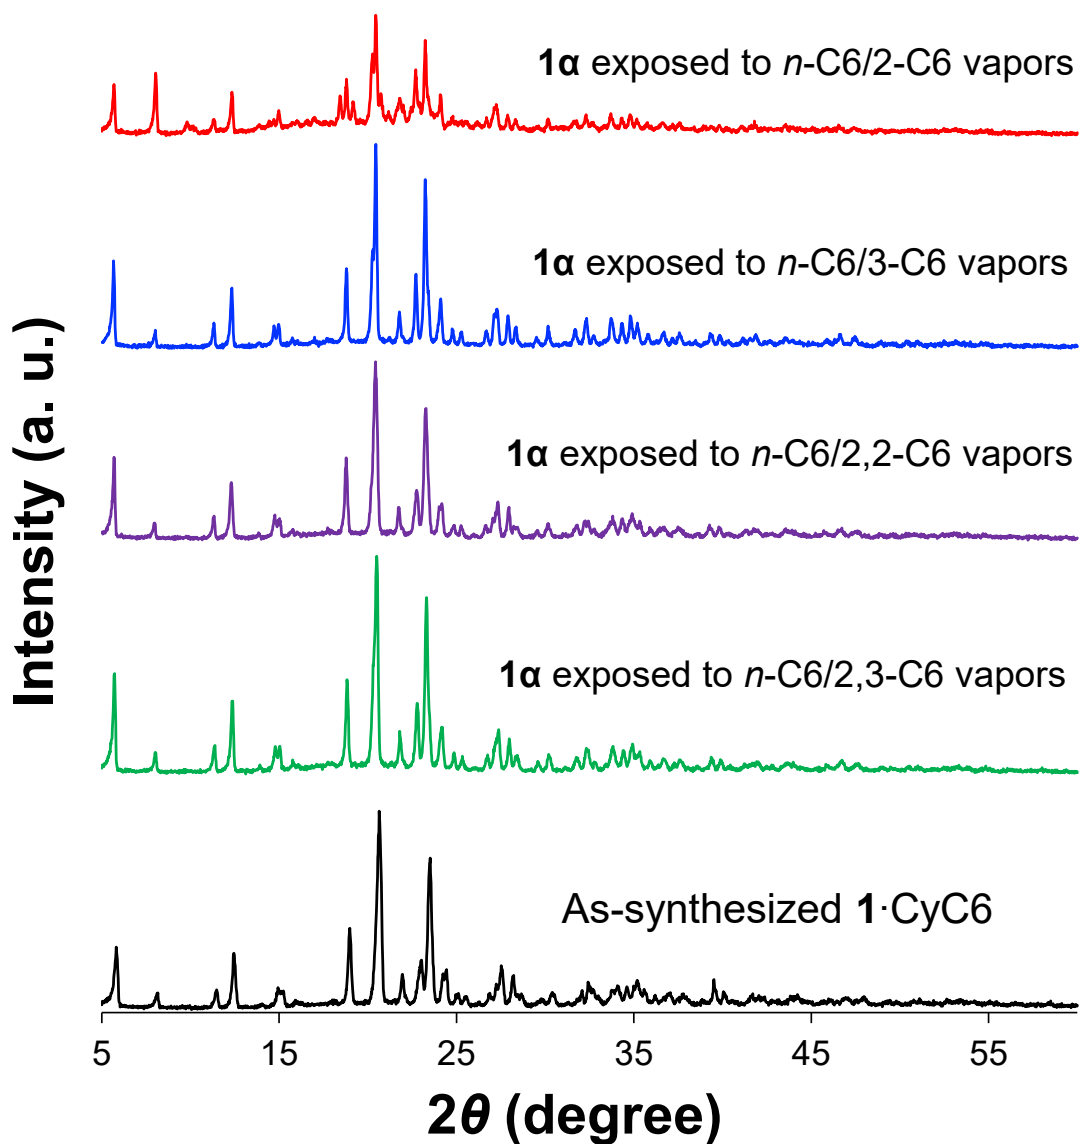

**Fig. S12** PXR D patterns of **1α** exposed to *n*-C6/2-C6 (red line), *n*-C6/3-C6 (blue line), *n*-C6/2,2-C6 (purple line), *n*-C6/2,3-MeCyC6 (green line) vapors as a two-component system, and as-synthesized **1·CyC6** (black line).

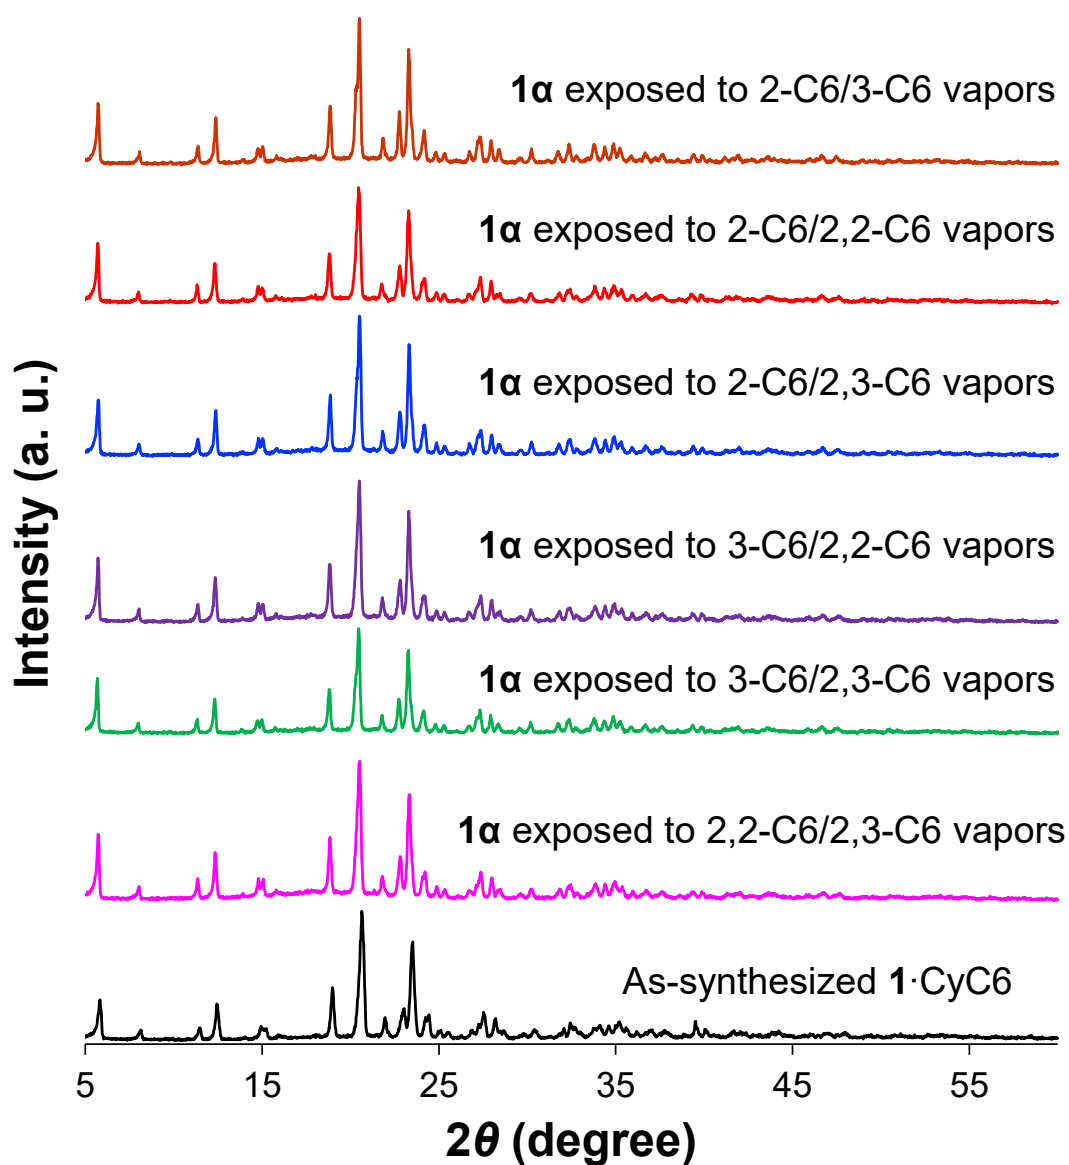

**Fig. S13** PXR D patterns of **1α** exposed to 2-C6/3-C6 (brown line), 2-C6/2,2-C6 (red line), 2-C6/2,3-C6 (blue line), 3-C6/2,2-C6 (purple line), 3-C6/2,3-C6 (green line), 2,2-C6/2,3-C6 (pink line) vapors as a two-component system, and as-synthesized **1·CyC6** (black line).

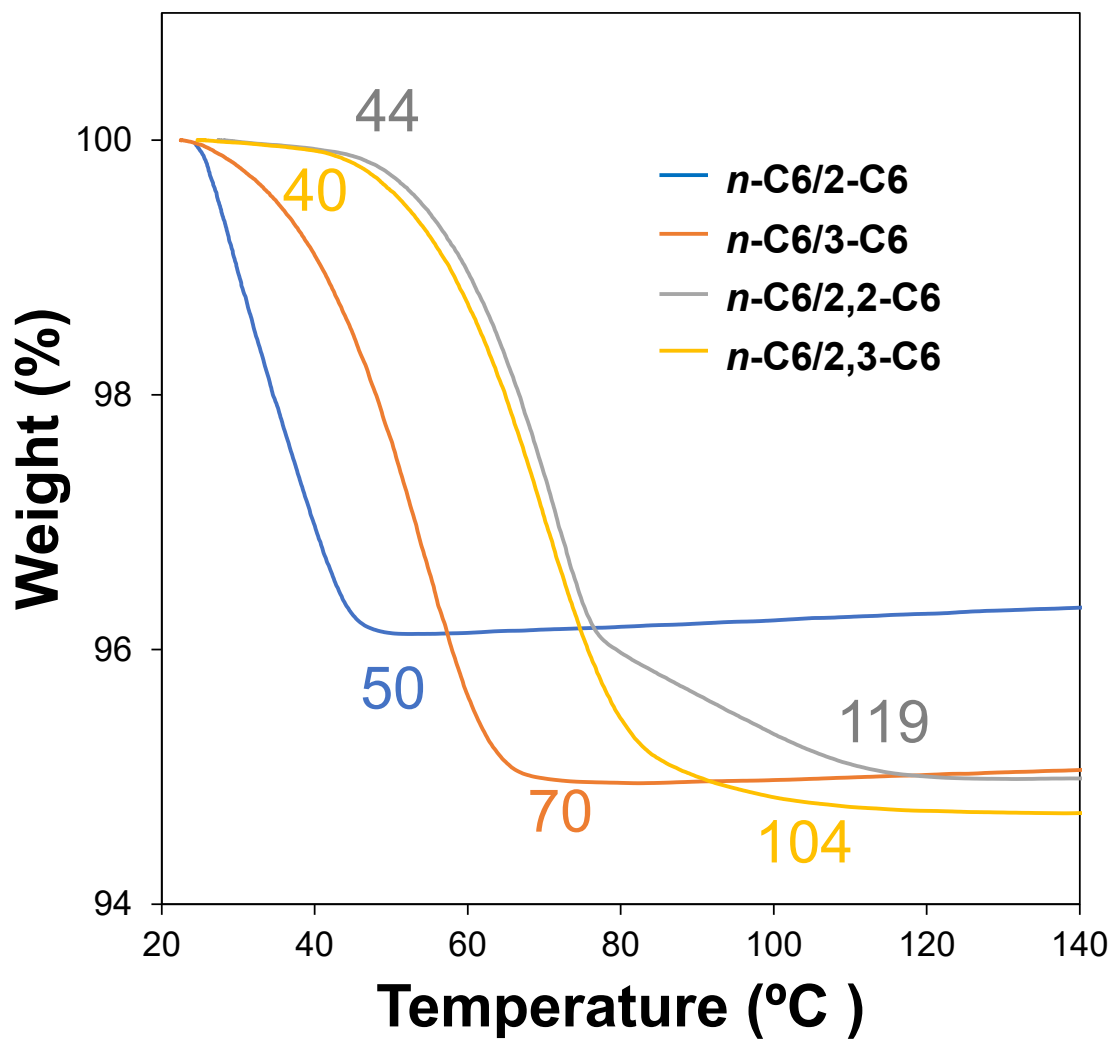

**Fig. S14** Thermogravimetric analysis (TGA) of *n*-C6/2-C6 (blue line), *n*-C6/3-C6 (orange line), *n*-C6/2,2-C6 (gray line), and *n*-C6/2,3-C6 (yellow line) adsorbed in **1a**.

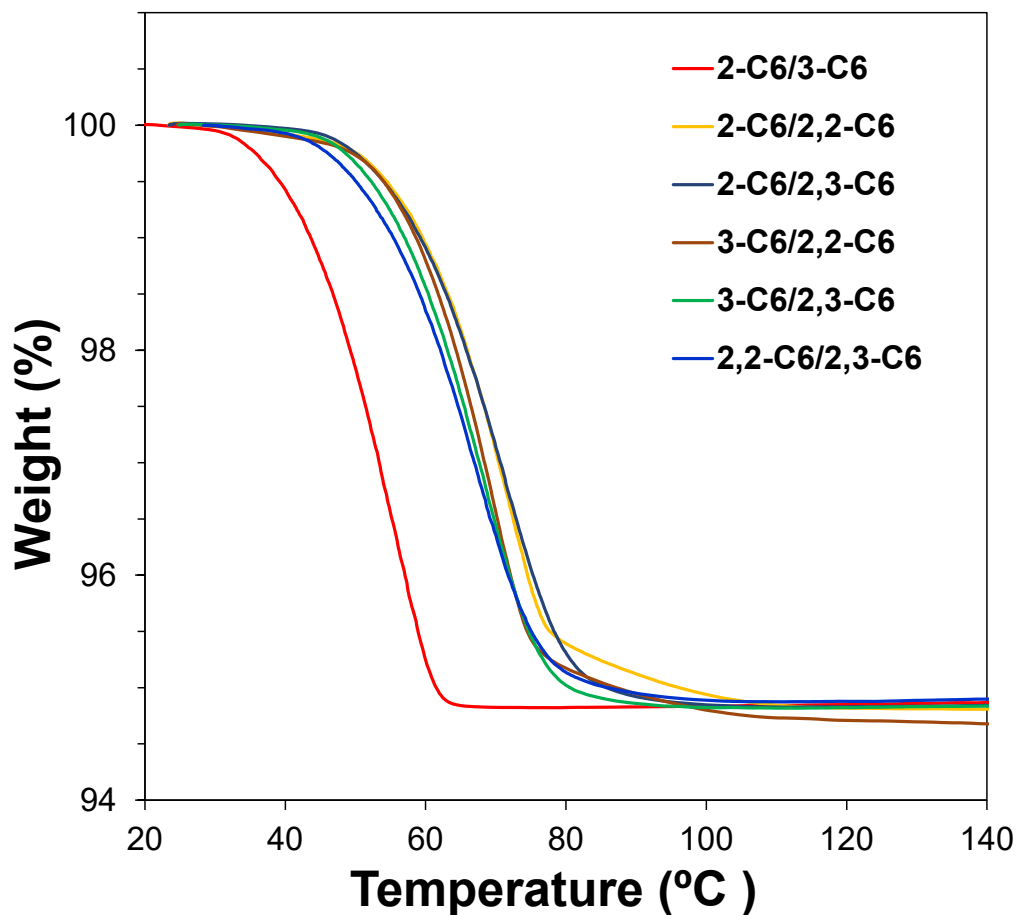

|               | Release start temperature (°C) | Release end temperature (°C) |
|---------------|--------------------------------|------------------------------|
| 2-C6/3-C6     | 30                             | 63                           |
| 2-C6/2,2-C6   | 48                             | 105                          |
| 2-C6/2,3-C6   | 44                             | 89                           |
| 3-C6/2,2-C6   | 46                             | 104                          |
| 3-C6/2,3-C6   | 42                             | 86                           |
| 2,2-C6/2,3-C6 | 40                             | 100                          |

**Fig. S15** Thermogravimetric analysis (TGA) and release start and end temperature (in the table) of 2-C6/3-C6 (red line), 2-C6/2,2-C6 (yellow line), 2-C6/2,3-C6 (dark blue line), 3-C6/2,2-C6 (brown line), 3-C6/2,3-C6 (green line), and 2,2-C6/2,3-C6 (blue line) adsorbed in **1a**.

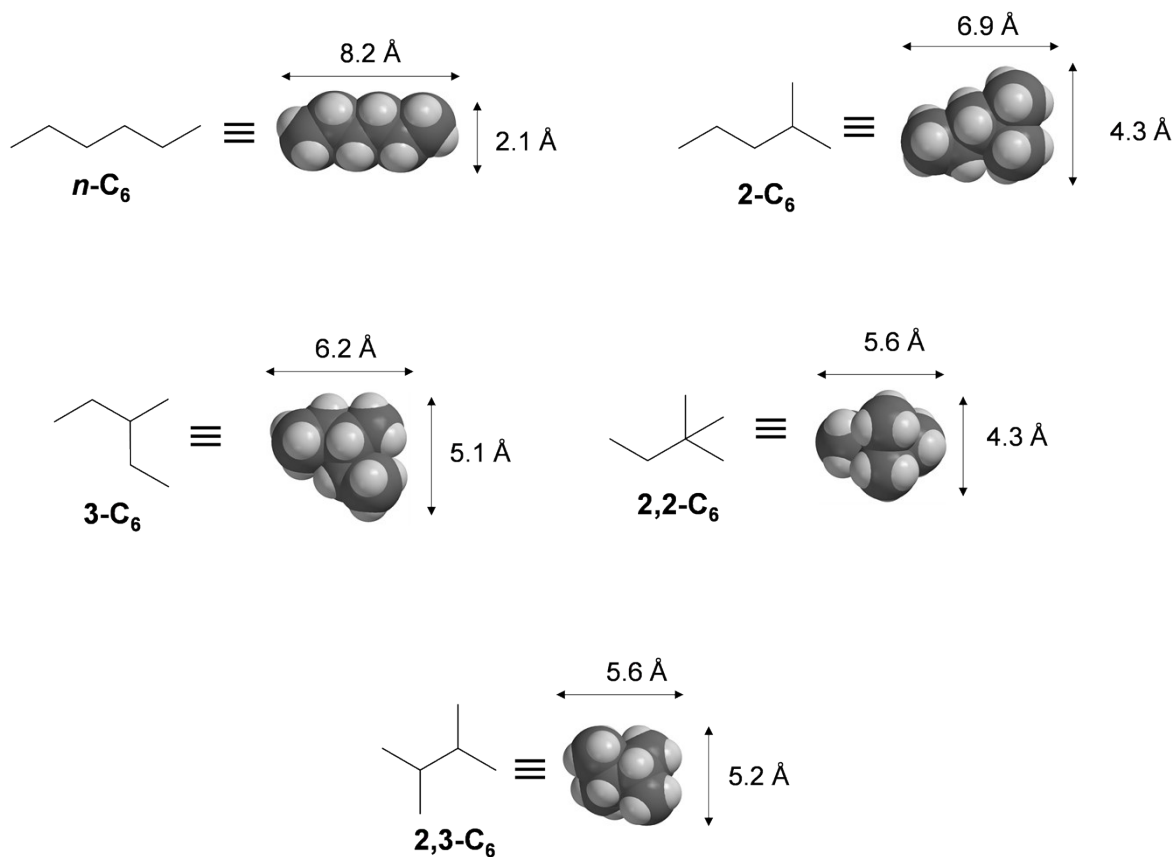

**Fig. S16** Molecular size of the three types of C<sub>6</sub> alkanes calculating by  $\omega$ B97X-D functional with 6-31G\* basis set using Spartan '16 software (version 2.0.7).<sup>S3</sup>

### 3. References

- S1 F. Hamada, M. Yamada, Y. Kondo, S. Ito and U. Akiba, *CrystEngComm*, **2011**, *13*, 6920-6923.
- S2 M. Yamada, F. Uemura, U. M. R. Kunda, T. Tanno, H. Katagiri and F. Hamada, *Chem. Eur. J.* **2020**, *26*, 8393–8399.
- S3 Spartan 16™, Wavefunction Inc., Irvine, CA, USA, 2016.
